# Supplementary material for: Competition between stability of icosahedral and cuboctahedral morphologies in bimetallic nanoalloys
Source: Royal Society of Chemistry journal article supplement (doi:10.1039/c7cp01081h), 2017-01-01
Supplement: c7cp01081h1.pdf [file c7cp01081h1.pdf]

Supporting information:

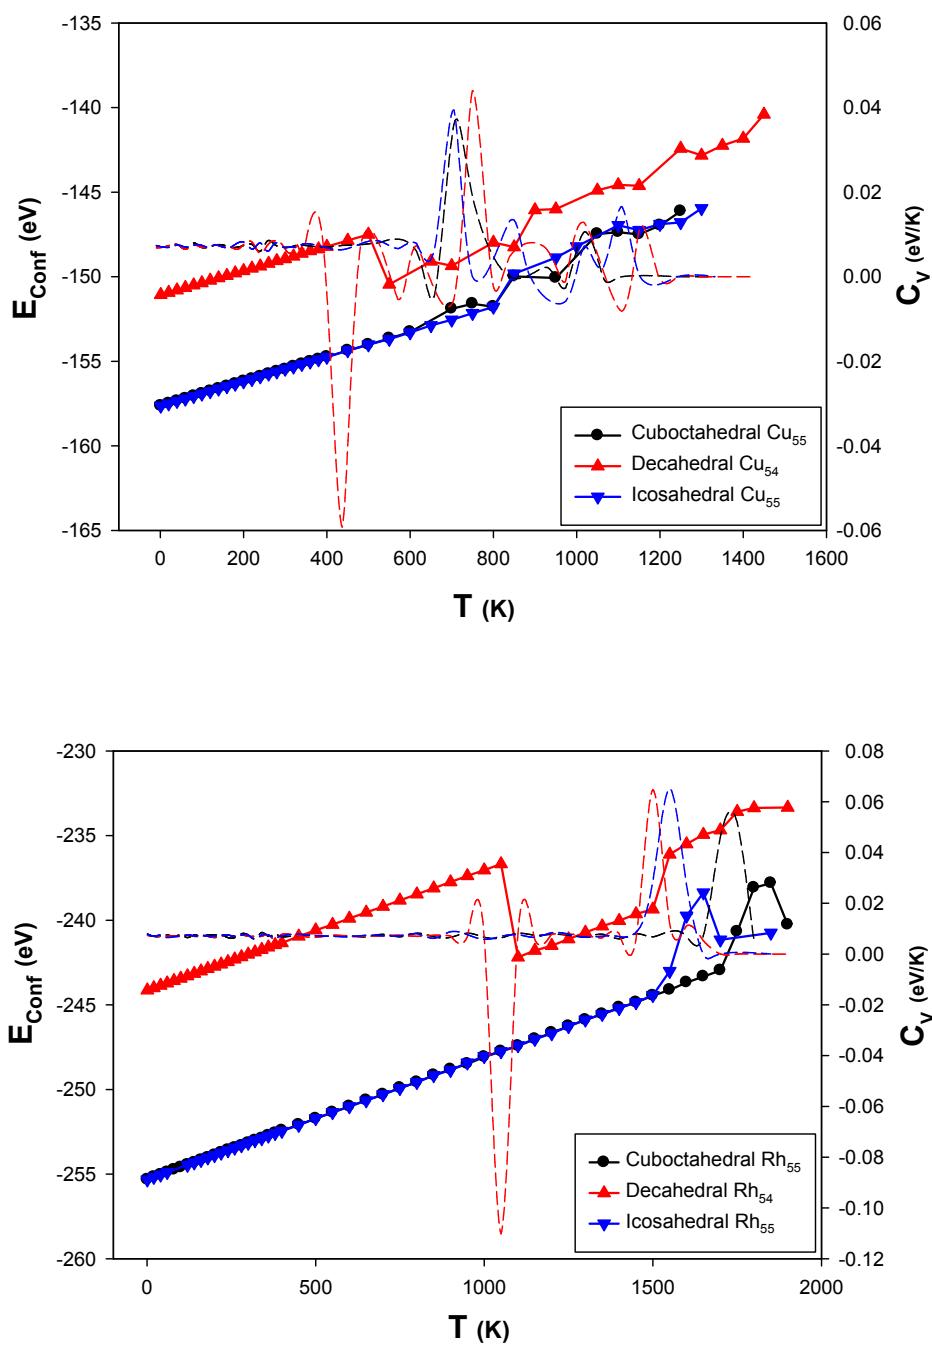

Fig. S1. The internal energy and heat capacity at constant volume for the pure copper and rhodium clusters in the three different structures.

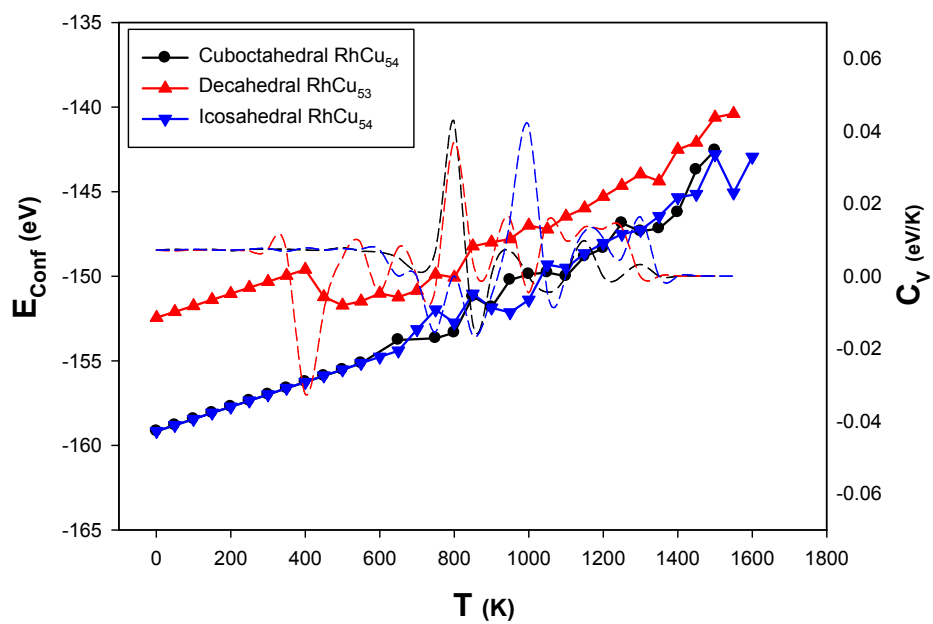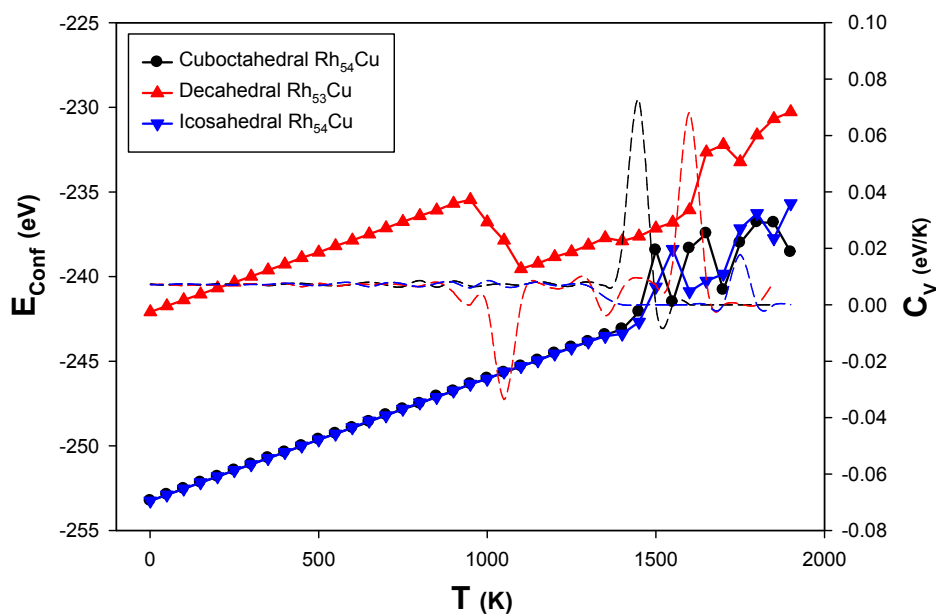

**Fig. S2.** The internal energy and heat capacity at constant volume for the single dopant clusters in the three different structures.

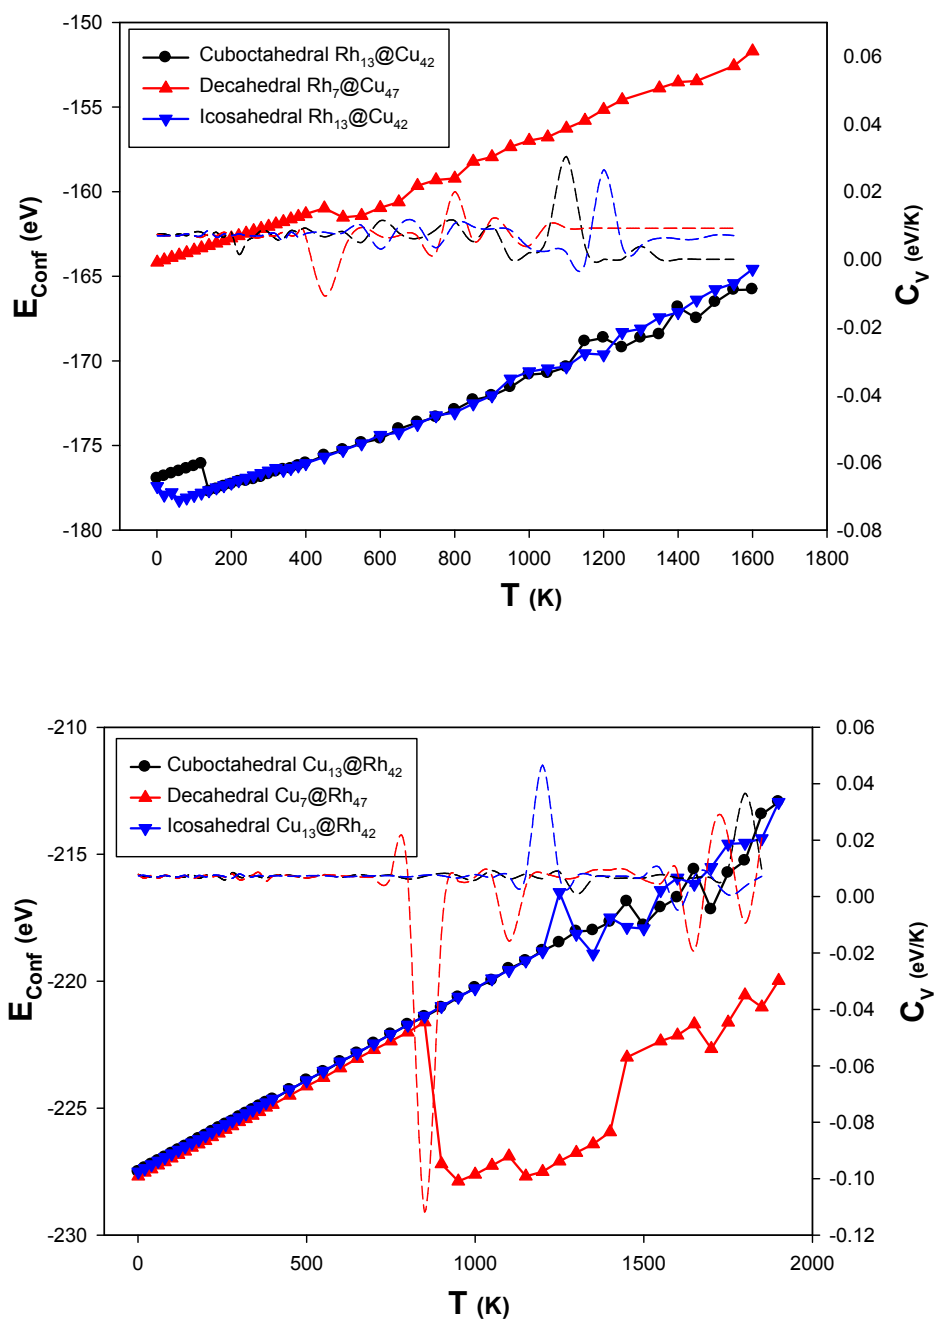

**Fig. S3.** The internal energy and heat capacity at constant volume for the core@shell clusters in the three different structures.

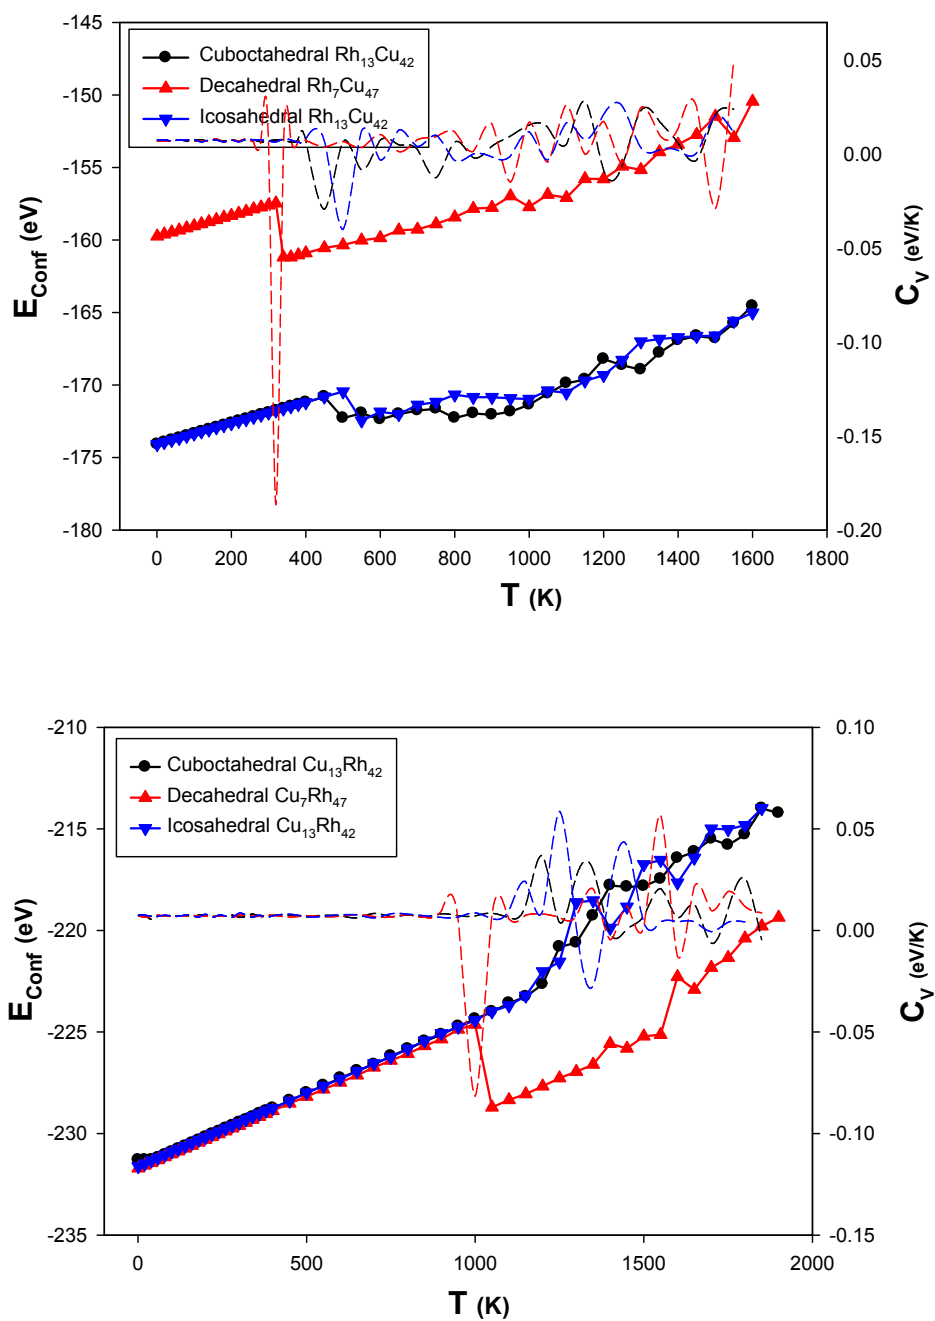

**Fig. S4.** The internal energy and heat capacity at constant volume for the different clusters with the alloy arrangement in the three different structures.
